# Supplementary material for: Effect of ZnO on Luminescence Performance of Terbium-Activated Zinc Borosilicate Glasses
Source: MDPI journal article supplement (doi:10.3390/ma17092154), 2024-05-04
Supplement: s1 [file s1]

Supplementary Materials

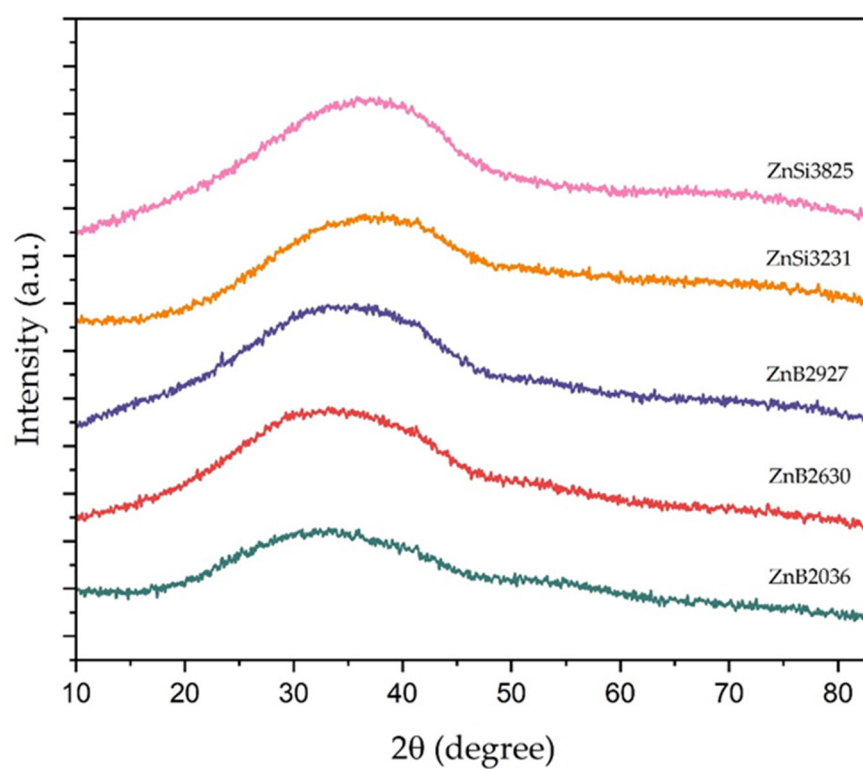

**Figure S1.** XRD patterns of as-cast transparent glass samples.

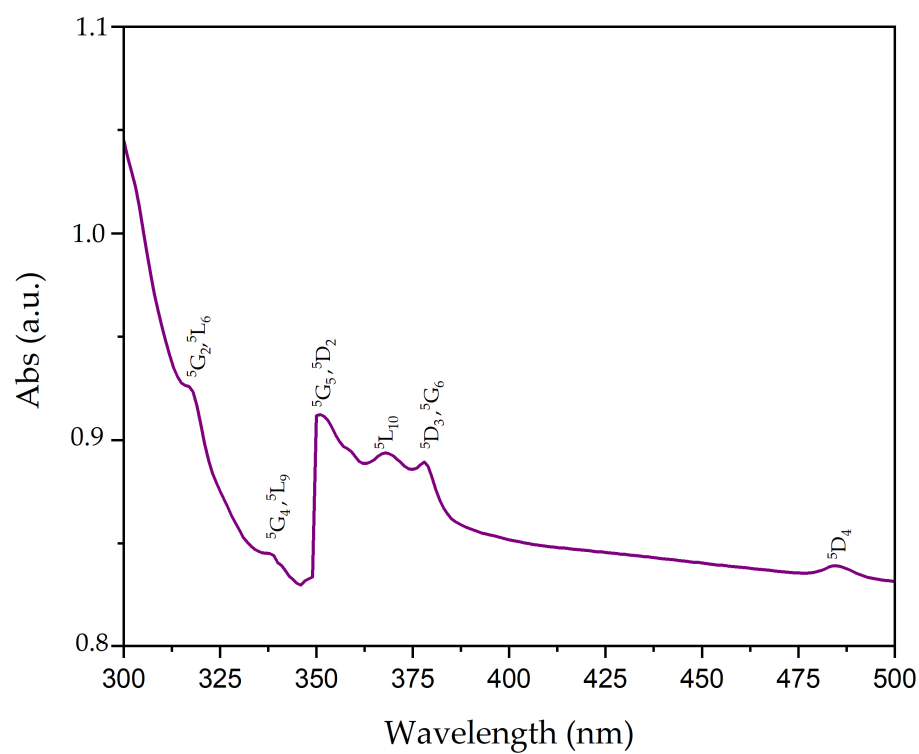

**Figure S2.** Absorption spectra of Tb<sup>3+</sup>-doped glass samples in the UV-Vis region.

Figure S2 shows the UV–vis room temperature absorption spectra for all Tb<sup>3+</sup>-doped zinc borosilicate glass samples. Six absorption peaks, at 317 nm, 338 nm, 351 nm, 368 nm, 378 nm, and 487 nm, were associated with the transition from the <sup>7</sup>F<sub>6</sub> ground state to the higher excited states of (<sup>5</sup>G<sub>2</sub>, <sup>5</sup>L<sub>6</sub>), (<sup>5</sup>G<sub>4</sub>, <sup>5</sup>L<sub>9</sub>), (<sup>5</sup>G<sub>5</sub>, <sup>5</sup>D<sub>2</sub>), <sup>5</sup>L<sub>10</sub>, (<sup>5</sup>D<sub>3</sub>, <sup>5</sup>G<sub>6</sub>), and <sup>5</sup>D<sub>4</sub>, respectively [46–49].
